# Supplementary material for: Variation in green roof vegetation health driven by age and design
Source: Research Square preprint supplement (doi:10.21203/rs.3.rs-6049604/v1), 2025-02-28
Supplement: Supplementary file 1 [file 2e496e1ded750be9d69f3e28.docx]

**Supplementary Information for:**

**Variation in green roof vegetation health driven by age and design**

Wenxi Liao1,2 *, Madison Appleby3, Howard Rosenblat3, Md. Abdul Halim1, Cheryl Rogers4, Jing M. Chen5, Liat Margolis3, Jennifer A. P. Drake6, Sean C. Thomas1

1Institute of Forestry and Conservation, John H Daniels Faculty of Architecture Landscape and Design, University of Toronto, 33 Willcocks St., Toronto, ON, M5S 3B3, Canada

2Department of Chemical Engineering, McGill University, 3610 Rue University, Montreal, QC, H3A 0C5, Canada

3John H. Daniels Faculty of Architecture, Landscape, and Design, University of Toronto, 1 Spadina Cres., Toronto, ON, M5S 2J5, Canada

4Department of Geography and Environmental Studies, Toronto Metropolitan University, 350 Victoria St., Toronto, ON, M5B 2K3, Canada

5Department of Geography and Planning, University of Toronto, 100 St George St., Toronto, ON, M5S 3G3, Canada

6Department of Civil and Environmental Engineering, Carleton University, 1125 Colonel By Drive, Ottawa, ON, K1S 5B6, Canada

* Corresponding author: Wenxi Liao

E-mail address: [wenxi.liao@mcgill.ca](mailto:wenxi.liao@mcgill.ca)

**Table of Content**

**Figures**

[**Fig. 1.** The change of vegetation health (mean NDVI) and patchiness (coefficient of variation of NDVI) with green roof age during the growing and pre-growing seasons.. 9](#_Toc187568877)

[**Fig. 2.** The change of vegetation health (mean SAVI, mean GNDVI, mean CIg) and patchiness (coefficient of variation of SAVI, GNDVI, and CIg) with green roof age during the growing and pre-growing seasons.. 10](#_Toc187568878)

[**Fig. 3.** The change of vegetation health (mean SAVI, mean GNDVI, mean CIg) and patchiness (coefficient of variation of SAVI, GNDVI, and CIg) with green roof age during the growing and pre-growing seasons.. 11](#_Toc187568879)

[**Fig. 4.** The change of vegetation health (mean NDVI) and patchiness (coefficient of variation of NDVI) with green roof age during the growing and pre-growing seasons.. 12](#_Toc187568880)

[**Fig. 5.** The change of vegetation health (mean SAVI, mean GNDVI, mean CIg) and patchiness (coefficient of variation of SAVI, GNDVI, and CIg) with green roof age during the growing and pre-growing seasons.. 13](#_Toc187568881)

[**Fig. 6.** Effects of design features on vegetation health during the pre-growing season (2018)... 14](#_Toc187568882)

[**Fig. 7.** Effects of design features on vegetation health during the growing (2017) and pre-growing (2018) seasons.. 15](#_Toc187568883)

[**Fig. 8.** Effects of design features on vegetation patchiness during the growing (2017) and pre-growing (2018) seasons. 16](#_Toc187568884)

[**Fig. 9.** Effects of design features on vegetation patchiness during the growing (2017) and pre-growing (2018) seasons.. 17](#_Toc187568885)

[**Fig. 10.** Effects of design features on vegetation health (mean SAVI, mean GNDVI, mean CIg) during the growing season (2017). 18](#_Toc187568886)

[**Fig. 11.** Effects of design features on vegetation health (mean SAVI, mean GNDVI, mean CIg) during the pre-growing season (2018).. 19](#_Toc187568887)

[**Fig. 12.** Effects of design features on vegetation patchiness (coefficient of variation of SAVI, GNDVI, CIg) during the growing season (2017).. 20](#_Toc187568888)

[**Fig. 13.** Effects of design features on vegetation patchiness (coefficient of variation of SAVI, GNDVI, CIg) during the pre-growing season (2018).. 21](#_Toc187568889)

[**Fig. 14.** Effects of design features on vegetation health (mean SAVI, mean GNDVI, mean CIg) during the growing season (2017).. 22](#_Toc187568890)

[**Fig. 15.** Effects of design features on vegetation health (mean SAVI, mean GNDVI, mean CIg) during the pre-growing season (2018). 23](#_Toc187568891)

[**Fig. 16.** Effects of design features on vegetation patchiness (coefficient of variation of SAVI, GNDVI, CIg) during the growing season (2017).. 24](#_Toc187568892)

[**Fig. 17.** Effects of design features on vegetation patchiness (coefficient of variation of SAVI, GNDVI, CIg) during the pre-growing season (2018).. 25](#_Toc187568893)

[**Fig. 18.** Effect of roof module area on vegetation health across building height categories during the pre-growing season (2018). 26](#_Toc187568894)

[**Fig. 19.** Exampleaerial images of intensive green roofs in the City of Toronto. 27](#_Toc187568895)

[**Fig. 20.** Correlations between mean NDVI and other vegetation indices on green roofs during 2011 and 2018 28](#_Toc187568896)

**Tables**

[**Table 1.** Multiple linear regression models for the design factors influencing the coefficient of variation (CV) of NDVI, SAVI, GNDVI, and CIg, with vegetation type included as the predictor.. 25](#_Toc187569049)

[**Table 2.** Multiple linear regression models for the design factors influencing the mean NDVI, SAVI, GNDVI, and CIg, with green roof type included as the predictor.. 26](#_Toc187569050)

[**Table 3.** Multiple linear regression models for the design factors influencing the coefficient of variation (CV) of NDVI, SAVI, GNDVI, and CIg, with green roof type included as the predictor.. 27](#_Toc187569051)

[**Table 4**. Linear regression models for the effects of design factors on the mean and coefficient of variation (CV) of NDVI, SAVI, GNDVI, and CIg.. 28](#_Toc187569052)

[**Table 5.** T-test summary for the effect of green roof type on mean NDVI, SAVI, GNDVI, and CIg.. 30](#_Toc187569053)

[**Table 6.** Descriptive statistics for the temporal changes of individual green roofs with at least three years of data grouped by vegetation type (grass, sedum mat, woody plant, and a mix of grass and woody plant).. 31](#_Toc187569054)

[**Table 7.** Multiple linear regression models for the design factors resulting in the temporal increase and decrease of mean NDVI on individual green roofs, with vegetation type included as the predictor.. 32](#_Toc187569055)

[**Table 8.** Multiple linear regression models for the design factors resulting in the temporal increase and decrease of mean NDVI on individual green roofs, with green roof type included as the predictor.. 33](#_Toc187569056)

[**Table 9.** Empirical linear regressions (reflectance = constant a × digital numbers) between digital numbers and reflectance for each band in each year. 34](#_Toc187569057)

[**Table 10.** Equations for Normalized Difference Vegetation Index (NDVI), Soil Adjusted Vegetation Index (SAVI), Green Normalized Difference Vegetation Index (GNDVI), and Green Chlorophyll Index (CIg). 36](#_Toc187569058)

**Fig. 1.** The change of vegetation health (mean NDVI) and patchiness (coefficient of variation of NDVI) with green roof age during the growing and pre-growing seasons. Extensive and intensive green roofs are shown in orange and blue colors, respectively. **a**, Mean NDVI during the growing seasons. **b**, Mean NDVI during the pre-growing seasons. **c**, coefficient of variation (CV) of NDVI during the growing seasons. **d**, CV of NDVI during the pre-growing seasons. Lines show fitted linear regression models with 95% confidence intervals in shade. Solid and dashed lines indicate models are significant (P < 0.05) and non-significant (P > 0.05), respectively.

**Fig. 2.** The change of vegetation health (mean SAVI, mean GNDVI, mean CIg) and patchiness (coefficient of variation of SAVI, GNDVI, and CIg) with green roof age during the growing and pre-growing seasons. **a**, Mean SAVI during the growing seasons. **b**, coefficient of variation (CV) SAVI during the pre-growing seasons. **c**, Mean GNDIV during the growing seasons. **d**, CV of GNDVI during the pre-growing seasons. **e**, Mean CIg during the growing seasons. **f**, CV of CIg during the pre-growing seasons. Lines show fitted linear regression models with 95% confidence intervals in shade. Solid and dashed lines indicate models are significant (P < 0.05) and non-significant (P > 0.05), respectively.

**Fig. 3.** The change of vegetation health (mean SAVI, mean GNDVI, mean CIg) and patchiness (coefficient of variation of SAVI, GNDVI, and CIg) with green roof age during the growing and pre-growing seasons. Extensive and intensive green roofs are shown in orange and blue colors, respectively. **a**, Mean SAVI during the growing seasons. **b**, Mean SAVI during the pre-growing seasons. **c**, Mean GNDIV during the growing seasons. **d**, Mean GNDVI during the pre-growing seasons. **e**, Mean CIg during the growing seasons. **f**, Mean CIg during the pre-growing seasons. **g**, coefficient of variation (CV) of SAVI during the growing seasons. **h**, CV of SAVI during the pre-growing seasons. **i**, CV of GNDVI during the growing seasons. **j**, CV of GNDVI during the pre-growing seasons. **k**, CV of CIg during the growing seasons. **l**, CV of CIg during the pre-growing seasons. Lines show fitted linear regression models with 95% confidence intervals in shade. Solid and dashed lines indicate models are significant (P < 0.05) and non-significant (P > 0.05), respectively.

**Fig. 4.** The change of vegetation health (mean NDVI) and patchiness (coefficient of variation of NDVI) with green roof age during the growing and pre-growing seasons. Grass, sedum mat, woody plant, and a mix of grass and woody plant are shown in blue, orange, green, and purple colors, respectively. **a**, Mean NDVI during the growing seasons. **b**, Mean NDVI during the pre-growing seasons. **c**, coefficient of variation (CV) of NDVI during the growing seasons. **d**, CV of NDVI during the pre-growing seasons. Lines show fitted linear regression models with 95% confidence intervals in shade. Solid and dashed lines indicate models are significant (P < 0.05) and non-significant (P > 0.05), respectively.

**Fig. 5.** The change of vegetation health (mean SAVI, mean GNDVI, mean CIg) and patchiness (coefficient of variation of SAVI, GNDVI, and CIg) with green roof age during the growing and pre-growing seasons. Grass, sedum mat, woody plant, and a mix of grass and woody plant are shown in blue, orange, green, and purple colors, respectively. **a**, Mean SAVI during the growing seasons. **b**, Mean SAVI during the pre-growing seasons. **c**, Mean GNDIV during the growing seasons. **d**, Mean GNDVI during the pre-growing seasons. **e**, Mean CIg during the growing seasons. **f**, Mean CIg during the pre-growing seasons. **g**, coefficient of variation (CV) of SAVI during the growing seasons. **h**, CV of SAVI during the pre-growing seasons. **i**, CV of GNDVI during the growing seasons. **j**, CV of GNDVI during the pre-growing seasons. **k**, CV of CIg during the growing seasons. **l**, CV of CIg during the pre-growing seasons. Lines show fitted linear regression models with 95% confidence intervals in shade. Solid and dashed lines indicate models are significant (P < 0.05) and non-significant (P > 0.05), respectively.

**Fig. 6.** Effects of design features on vegetation health during the pre-growing season (2018). Extensive and intensive green roofs are shown in orange and blue colors, respectively. **a**, effect of roof module area on mean NDVI. **b**, effect of building height on mean NDVI. **c**, effect of green roof type on mean NDVI. **d**, effect of roof module aspect ratio on mean NDVI. Lines show fitted linear regression models with 95% confidence intervals in shade. Solid and dashed lines indicate models are significant (P < 0.05) and non-significant (P > 0.05), respectively. Bars with different lowercase letters differ significantly at P < 0.05 according to t-tests.

**Fig. 7.** Effects of design features on vegetation health during the growing (2017) and pre-growing (2018) seasons.Grass, sedum mat, woody plant, and a mix of grass and woody plant are shown in blue, orange, green, and purple colors, respectively. **a**, effect of roof module area on mean NDVI during the growing season. **b**, effect of roof module area on mean NDVI during the pre-growing season. **c**, effect of building height on mean NDVI during the growing season. **d**, effect of building height on mean NDVI during the pre-growing season. **e**, effect of green roof type on mean NDVI during the growing season. **f**, effect of green roof type on mean NDVI during the pre-growing season. **g**, effect of roof module aspect ratio on mean NDVI during the growing season. **h**, effect of roof module aspect ratio on mean NDVI during the pre-growing season. Lines show fitted linear regression models with 95% confidence intervals in shade. Solid and dashed lines indicate models are significant (P < 0.05) and non-significant (P > 0.05), respectively. Bars with different lowercase letters differ significantly at P < 0.05 according to t-tests.

**Fig. 8.** Effects of design features on vegetation patchiness during the growing (2017) and pre-growing (2018) seasons. Extensive and intensive green roofs are shown in orange and blue colors, respectively. **a**, effect of roof module area on coefficient of variation (CV) of NDVI during the growing season. **b**, effect of roof module area on CV of NDVI during the pre-growing season. **c**, effect of building height on CV of NDVI during the growing season. **d**, effect of building height on CV of NDVI during the pre-growing season. **e**, effect of green roof type on CV of NDVI during the growing season. **f**, effect of green roof type on CV of NDVI during the pre-growing season. **g**, effect of roof module aspect ratio on CV of NDVI during the growing season. **h**, effect of roof module aspect ratio on CV of NDVI during the pre-growing season. Lines show fitted linear regression models with 95% confidence intervals in shade. Solid and dashed lines indicate models are significant (P < 0.05) and non-significant (P > 0.05), respectively. Bars with different lowercase letters differ significantly at P < 0.05 according to t-tests.

**Fig. 9.** Effects of design features on vegetation patchiness during the growing (2017) and pre-growing (2018) seasons. Grass, sedum mat, woody plant, and a mix of grass and woody plant are shown in blue, orange, green, and purple colors, respectively. **a**, effect of roof module area on coefficient of variation (CV) of NDVI during the growing season. **b**, effect of roof module area on CV of NDVI during the pre-growing season. **c**, effect of building height on CV of NDVI during the growing season. **d**, effect of building height on CV of NDVI during the pre-growing season. **e**, effect of green roof type on CV of NDVI during the growing season. **f**, effect of green roof type on CV of NDVI during the pre-growing season. **g**, effect of roof module aspect ratio on CV of NDVI during the growing season. **h**, effect of roof module aspect ratio on CV of NDVI during the pre-growing season. Lines show fitted linear regression models with 95% confidence intervals in shade. Solid and dashed lines indicate models are significant (P < 0.05) and non-significant (P > 0.05), respectively. Bars with different lowercase letters differ significantly at P < 0.05 according to t-tests.

**Fig. 10.** Effects of design features on vegetation health (mean SAVI, mean GNDVI, mean CIg) during the growing season (2017). Extensive and intensive green roofs are shown in orange and blue colors, respectively. **a**, effect of roof module area on mean SAVI. **b**, effect of building height on mean SAVI. **c**, effect of green roof type on mean SAVI. **d**, effect of roof module aspect ratio on mean SAVI. **e**, effect of roof module area on mean GNDVI. **f**, effect of building height on mean GNDVI. **g**, effect of green roof type on mean GNDVI. **h**, effect of roof module aspect ratio on mean GNDVI. **i**, effect of roof module area on mean CIg. **j**, effect of building height on mean CIg. **k**, effect of green roof type on mean CIg. **l**, effect of roof module aspect ratio on mean CIg. Lines show fitted linear regression models with 95% confidence intervals in shade. Solid and dashed lines indicate models are significant (P < 0.05) and non-significant (P > 0.05), respectively. Bars with different lowercase letters differ significantly at P < 0.05 according to t-tests.

**Fig. 11.** Effects of design features on vegetation health (mean SAVI, mean GNDVI, mean CIg) during the pre-growing season (2018). Extensive and intensive green roofs are shown in orange and blue colors, respectively. **a**, effect of roof module area on mean SAVI. **b**, effect of building height on mean SAVI. **c**, effect of green roof type on mean SAVI. **d**, effect of roof module aspect ratio on mean SAVI. **e**, effect of roof module area on mean GNDVI. **f**, effect of building height on mean GNDVI. **g**, effect of green roof type on mean GNDVI. **h**, effect of roof module aspect ratio on mean GNDVI. **i**, effect of roof module area on mean CIg. **j**, effect of building height on mean CIg. **k**, effect of green roof type on mean CIg. **l**, effect of roof module aspect ratio on mean CIg. Lines show fitted linear regression models with 95% confidence intervals in shade. Solid and dashed lines indicate models are significant (P < 0.05) and non-significant (P > 0.05), respectively. Bars with different lowercase letters differ significantly at P < 0.05 according to t-tests.

**Fig. 12.** Effects of design features on vegetation patchiness (coefficient of variation of SAVI, GNDVI, CIg) during the growing season (2017). Extensive and intensive green roofs are shown in orange and blue colors, respectively. **a**, effect of roof module area on coefficient of variation (CV) of SAVI. **b**, effect of building height on CV of SAVI. **c**, effect of green roof type on CV of SAVI. **d**, effect of roof module aspect ratio on CV of SAVI. **e**, effect of roof module area on CV of GNDVI. **f**, effect of building height on CV of GNDVI. **g**, effect of green roof type on CV of GNDVI. **h**, effect of roof module aspect ratio on CV of GNDVI. **i**, effect of roof module area on CV of CIg. **j**, effect of building height on CV of CIg. **k**, effect of green roof type on CV of CIg. **l**, effect of roof module aspect ratio on CV of CIg. Lines show fitted linear regression models with 95% confidence intervals in shade. Solid and dashed lines indicate models are significant (P < 0.05) and non-significant (P > 0.05), respectively. Bars with different lowercase letters differ significantly at P < 0.05 according to t-tests.

**Fig. 13.** Effects of design features on vegetation patchiness (coefficient of variation of SAVI, GNDVI, CIg) during the pre-growing season (2018). Extensive and intensive green roofs are shown in orange and blue colors, respectively. **a**, effect of roof module area on coefficient of variation (CV) of SAVI. **b**, effect of building height on CV of SAVI. **c**, effect of green roof type on CV of SAVI. **d**, effect of roof module aspect ratio on CV of SAVI. **e**, effect of roof module area on CV of GNDVI. **f**, effect of building height on CV of GNDVI. **g**, effect of green roof type on CV of GNDVI. **h**, effect of roof module aspect ratio on CV of GNDVI. **i**, effect of roof module area on CV of CIg. **j**, effect of building height on CV of CIg. **k**, effect of green roof type on CV of CIg. **l**, effect of roof module aspect ratio on CV of CIg. Lines show fitted linear regression models with 95% confidence intervals in shade. Solid and dashed lines indicate models are significant (P < 0.05) and non-significant (P > 0.05), respectively. Bars with different lowercase letters differ significantly at P < 0.05 according to t-tests.

**Fig. 14.** Effects of design features on vegetation health (mean SAVI, mean GNDVI, mean CIg) during the growing season (2017). Grass, sedum mat, woody plant, and a mix of grass and woody plant are shown in blue, orange, green, and purple colors, respectively. **a**, effect of roof module area on mean SAVI. **b**, effect of building height on mean SAVI. **c**, effect of green roof type on mean SAVI. **d**, effect of roof module aspect ratio on mean SAVI. **e**, effect of roof module area on mean GNDVI. **f**, effect of building height on mean GNDVI. **g**, effect of green roof type on mean GNDVI. **h**, effect of roof module aspect ratio on mean GNDVI. **i**, effect of roof module area on mean CIg. **j**, effect of building height on mean CIg. **k**, effect of green roof type on mean CIg. **l**, effect of roof module aspect ratio on mean CIg. Lines show fitted linear regression models with 95% confidence intervals in shade. Solid and dashed lines indicate models are significant (P < 0.05) and non-significant (P > 0.05), respectively. Bars with different lowercase letters differ significantly at P < 0.05 according to t-tests.

**Fig. 15.** Effects of design features on vegetation health (mean SAVI, mean GNDVI, mean CIg) during the pre-growing season (2018). Grass, sedum mat, woody plant, and a mix of grass and woody plant are shown in blue, orange, green, and purple colors, respectively. **a**, effect of roof module area on mean SAVI. **b**, effect of building height on mean SAVI. **c**, effect of green roof type on mean SAVI. **d**, effect of roof module aspect ratio on mean SAVI. **e**, effect of roof module area on mean GNDVI. **f**, effect of building height on mean GNDVI. **g**, effect of green roof type on mean GNDVI. **h**, effect of roof module aspect ratio on mean GNDVI. **i**, effect of roof module area on mean CIg. **j**, effect of building height on mean CIg. **k**, effect of green roof type on mean CIg. **l**, effect of roof module aspect ratio on mean CIg. Lines show fitted linear regression models with 95% confidence intervals in shade. Solid and dashed lines indicate models are significant (P < 0.05) and non-significant (P > 0.05), respectively. Bars with different lowercase letters differ significantly at P < 0.05 according to t-tests

**Fig. 16.** Effects of design features on vegetation patchiness (coefficient of variation of SAVI, GNDVI, CIg) during the growing season (2017). Grass, sedum mat, woody plant, and a mix of grass and woody plant are shown in blue, orange, green, and purple colors, respectively. **a**, effect of roof module area on coefficient of variation (CV) of SAVI. **b**, effect of building height on CV of SAVI. **c**, effect of green roof type on CV of SAVI. **d**, effect of roof module aspect ratio on CV of SAVI. **e**, effect of roof module area on CV of GNDVI. **f**, effect of building height on CV of GNDVI. **g**, effect of green roof type on CV of GNDVI. **h**, effect of roof module aspect ratio on CV of GNDVI. **i**, effect of roof module area on CV of CIg. **j**, effect of building height on CV of CIg. **k**, effect of green roof type on CV of CIg. **l**, effect of roof module aspect ratio on CV of CIg. Lines show fitted linear regression models with 95% confidence intervals in shade. Solid and dashed lines indicate models are significant (P < 0.05) and non-significant (P > 0.05), respectively. Bars with different lowercase letters differ significantly at P < 0.05 according to t-tests.

**Fig. 17.** Effects of design features on vegetation patchiness (coefficient of variation of SAVI, GNDVI, CIg) during the pre-growing season (2018). Grass, sedum mat, woody plant, and a mix of grass and woody plant are shown in blue, orange, green, and purple colors, respectively. **a**, effect of roof module area on coefficient of variation (CV) of SAVI. **b**, effect of building height on CV of SAVI. **c**, effect of green roof type on CV of SAVI. **d**, effect of roof module aspect ratio on CV of SAVI. **e**, effect of roof module area on CV of GNDVI. **f**, effect of building height on CV of GNDVI. **g**, effect of green roof type on CV of GNDVI. **h**, effect of roof module aspect ratio on CV of GNDVI. **i**, effect of roof module area on CV of CIg. **j**, effect of building height on CV of CIg. **k**, effect of green roof type on CV of CIg. **l**, effect of roof module aspect ratio on CV of CIg. Lines show fitted linear regression models with 95% confidence intervals in shade. Solid and dashed lines indicate models are significant (P < 0.05) and non-significant (P > 0.05), respectively. Bars with different lowercase letters differ significantly at P < 0.05 according to t-tests.

**Fig. 18.** Effect of roof module area on vegetation health across building height categories during the pre-growing season (2018). **a**, piecewise linear regression models depicting roof module area effect on vegetation health on the low-rise, mid-rise, and high-rise. **b**, vegetation health on the low-rise, mid-rise, and high-rise. Vegetation health is represented as mean NDVI. Green, purple, and blue colors indicate low-rise, mid-rise, and high-rise buildings, respectively. Lines depict fitted piecewise linear regression models with 95% confidence intervals in shade. The segment points, indicated by vertical dotted lines representing square root transformed roof module area, are 5.6 m for low-rise buildings, 7 m for mid-rise buildings, and 1.1 m high-rise buildings. Solid and dashed lines indicate models are significant (P < 0.05) and non-significant (P > 0.05), respectively. Bars with different uppercase letters differ significantly at P < 0.05 according to Tukey's HSD test.

**Fig. 19.** Exampleaerial images of intensive green roofs in the City of Toronto.

**Fig. 20.** Correlations between mean NDVI and other vegetation indices on green roofs during 2011 and 2018. a, mean NDVI vs. mean SAVI. b, mean NDVI vs. mean GNDVI. c, mean NDVI vs. mean CIg. Lines show fitted linear regression models with 95% confidence intervals in shade.

**Table 1.** Multiple linear regression models for the design factors influencing the coefficient of variation (CV) of NDVI, SAVI, GNDVI, and CIg, with vegetation type included as the predictor. Asterisks indicate significance of one-way ANOVA: (*), P < 0.1 *, P < 0.05; **, P < 0.01; ***, P < 0.001. Statistically significant relationships (P < 0.05) are in boldface type.

| **Predictors** | **CV of NDVI** | | **CV of SAVI** | | **CV of GNDVI** | | **CV of CIg** | |
| --- | --- | --- | --- | --- | --- | --- | --- | --- |
|  | **Growing season** | **Pre-growing season** | **Growing season** | **Pre-growing season** | **Growing season** | **Pre-growing season** | **Growing season** | **Pre-growing season** |
| **Intercept** | 0.0295*** | 0.0273*** | 0.0230*** | 0.0220*** | 0.0318*** | 0.0311*** | 0.0776*** | 0.0752*** |
| **Roof module area** | - | 0.00001 (*) | - | 0.000004 (*) | –0.000007 (*) | - | - | - |
| **Building height** | - | 0.00006** | - | 0.00004** | - | 0.00005** | - | - |
| **Vegetation type: mix of grass and tree (vs. grass)** | 0.0264*** | –0.0005 | 0.0258*** | 0.0125* | 0.0182** | 0.0122* | 0.0585*** | 0.0376* |
| **Vegetation type: sedum mat (vs. grass)** | 0.0123*** | 0.0035 (*) | 0.0122*** | 0.0042*** | 0.0144*** | 0.0067*** | 0.0402*** | 0.0213*** |
| **Vegetation type: woody plants (vs. grass)** | 0.0104*** | 0.0070** | 0.0091*** | 0.0077*** | 0.0058** | 0.0065*** | 0.0177*** | 0.0202*** |
| **Roof module aspect ratio** | 0.00007* | 0.00007* | 0.00006* | 0.00008*** | 0.0001*** | 0.0001*** | 0.0003*** | 0.0003*** |
| **AIC** | –8026 | –5923 | –8351 | –10104 | –8149 | –9863 | –6171 | –7535 |
| **Adjusted R2** | 0.063 | 0.031 | 0.083 | 0.038 | 0.116 | 0.044 | 0.125 | 0.052 |
| ***P*-value** | **< 0.001** | **< 0.001** | **< 0.001** | **< 0.001** | **< 0.001** | **< 0.001** | **< 0.001** | **< 0.001** |

**Table 2.** Multiple linear regression models for the design factors influencing the mean NDVI, SAVI, GNDVI, and CIg, with green roof type included as the predictor. Asterisks indicate significance of one-way ANOVA: (*), P < 0.1 *, P < 0.05; **, P < 0.01; ***, P < 0.001. Statistically significant relationships (P < 0.05) are in boldface type.

| **Predictors** | **Mean NDVI** | | **Mean SAVI** | | **Mean GNDVI** | | **Mean CIg** | |
| --- | --- | --- | --- | --- | --- | --- | --- | --- |
|  | **Growing season** | **Pre-growing season** | **Growing season** | **Pre-growing season** | **Growing season** | **Pre-growing season** | **Growing season** | **Pre-growing season** |
| **Intercept** | 0.2013*** | 0.1252*** | 0.1578*** | 0.1152*** | 0.2309*** | 0.1955*** | 0.6717*** | 0.5462*** |
| **Roof module area** | 0.0002*** | 0.0001*** | 0.0002*** | 0.0001*** | 0.0002*** | 0.0001*** | 0.0008*** | 0.0003*** |
| **Building height** | –0.0004*** | –0.0003*** | –0.0003** | –0.0003*** | –0.0004*** | –0.0006*** | –0.0015*** | –0.0019*** |
| **Green roof type  (1 = int, 0 = ext)** | –0.0306*** | –0.0127 (*) | –0.0168* | –0.0076 | –0.0235** | –0.0161* | –0.0835** | –0.0539* |
| **Roof module aspect ratio** | –0.0004* | 0.0004** | –0.0003* | 0.0002 (*) | –0.0004* | 0.0002 (*) | –0.0016** | - |
| **AIC** | –4619 | –3840 | –5028 | –6600 | –4629 | –5817 | –1966 | –2955 |
| **Adjusted R2** | 0.107 | 0.073 | 0.107 | 0.078 | 0.122 | 0.103 | 0.121 | 0.093 |
| ***P*-value** | **< 0.001** | **< 0.001** | **< 0.001** | **< 0.001** | **< 0.001** | **< 0.001** | **< 0.001** | **< 0.001** |

**Table 3.** Multiple linear regression models for the design factors influencing the coefficient of variation (CV) of NDVI, SAVI, GNDVI, and CIg, with green roof type included as the predictor. Asterisks indicate significance of one-way ANOVA: (*), P < 0.1 *, P < 0.05; **, P < 0.01; ***, P < 0.001. Statistically significant relationships (P < 0.05) are in boldface type.

| **Predictors** | **CV of NDVI** | | **CV of SAVI** | | **CV of GNDVI** | | **CV of CIg** | |
| --- | --- | --- | --- | --- | --- | --- | --- | --- |
|  | **Growing season** | **Pre-growing season** | **Growing season** | **Pre-growing season** | **Growing season** | **Pre-growing season** | **Growing season** | **Pre-growing season** |
| **Intercept** | 0.0384*** | 0.0296*** | 0.0316*** | 0.02516*** | 0.0418*** | 0.0367*** | 0.1049*** | 0.0898*** |
| **Roof module area** | 0.00001* | 0.00001* | 0.00001** | 0.000006* | - | - | 0.00003** | 0.00002* |
| **Building height** | - | 0.00006** | - | 0.00004* | - | 0.00004* | - | - |
| **Green roof type  (1 = int, 0 = ext)** | - | 0.0042* | - | 0.0047*** | –0.0042** | - | –0.0092* | 0.0057 (*) |
| **Roof module aspect ratio** | 0.00009** | 0.00008* | 0.00009** | 0.00009*** | 0.0002*** | 0.0001*** | 0.0004*** | 0.0003*** |
| **AIC** | –7978 | –5923 | –8286 | –10096 | –8075 | –9843 | –6087 | –7507 |
| **Adjusted R2** | 0.015 | 0.028 | 0.020 | 0.031 | 0.047 | 0.025 | 0.049 | 0.028 |
| ***P*-value** | **< 0.001** | **< 0.001** | **< 0.001** | **< 0.001** | **< 0.001** | **< 0.001** | **< 0.001** | **< 0.001** |

**Table 4**. Linear regression models for the effects of design factors on the mean and coefficient of variation (CV) of NDVI, SAVI, GNDVI, and CIg. Statistically significant relationships (P < 0.05) are in boldface type.

| **Vegetation index** | **Parameter** | **Regression** | **SQRT Area** | | **Building height** | | **SQRT aspect ratio** | |
| --- | --- | --- | --- | --- | --- | --- | --- | --- |
|  |  |  | **Growing season** | **Pre-growing season** | **Growing season** | **Pre-growing season** | **Growing season** | **Pre-growing season** |
| **NDVI** | **Mean NDVI** | Estimate | 0.0064 | 0.0042 | -0.0003 | -0.0005 | 0.0022 | 0.0062 |
| Intercept | 0.1458 | 0.1033 | 0.2057 | 0.1485 | 0.1881 | 0.1147 |
| DF | 1032 | 1235 | 1032 | 1235 | 1016 | 1208 |
| Adjusted R2 | 0.138 | 0.108 | 0.008 | 0.028 | 0.001 | 0.021 |
| *P* | **< 0.001** | **< 0.001** | **0.002** | **< 0.001** | 0.213 | **< 0.001** |
| **CV of NDVI** | Estimate | 0.0005 | 0.0004 | 0.000003 | 0.00004 | 0.0015 | 0.0012 |
| Intercept | 0.0368 | 0.0322 | 0.0404 | 0.0336 | 0.0356 | 0.0311 |
| DF | 1032 | 1235 | 1032 | 1235 | 1016 | 1208 |
| Adjusted R2 | 0.023 | 0.014 | -0.001 | 0.003 | 0.022 | 0.015 |
| *P* | **< 0.001** | **< 0.001** | 0.888 | **0.022** | **< 0.001** | **< 0.001** |
| **SAVI** | **Mean SAVI** | Estimate | 0.0056 | 0.0036 | -0.0003 | -0.0004 | 0.0024 | 0.0052 |
| Intercept | 0.1148 | 0.0863 | 0.1651 | 0.1240 | 0.1494 | 0.0964 |
| DF | 1032 | 1235 | 1032 | 1235 | 1016 | 1208 |
| Adjusted R2 | 0.154 | 0.118 | 0.006 | 0.024 | 0.002 | 0.022 |
| *P* | **< 0.001** | **< 0.001** | **0.007** | **< 0.001** | 0.084 | **< 0.001** |
| **CV of SAVI** | Estimate | 0.0005 | 0.0004 | 0.0000 | 0.0000 | 0.0014 | 0.0012 |
| Intercept | 0.0300 | 0.0264 | 0.0338 | 0.0282 | 0.0293 | 0.0254 |
| DF | 1032 | 1235 | 1032 | 1235 | 1016 | 1208 |
| Adjusted R2 | 0.032 | 0.022 | -0.001 | 0.002 | 0.025 | 0.021 |
| *P* | **< 0.001** | **< 0.001** | 0.976 | 0.058 | **< 0.001** | **< 0.001** |
| **GNDVI** | **Mean GNDVI** | Estimate | 0.0072 | 0.0054 | -0.0004 | -0.0006 | 0.0025 | 0.0073 |
| Intercept | 0.1729 | 0.1477 | 0.2391 | 0.2068 | 0.2197 | 0.1644 |
| DF | 1032 | 1235 | 1032 | 1235 | 1016 | 1208 |
| Adjusted R2 | 0.170 | 0.134 | 0.009 | 0.038 | 0.001 | 0.023 |
| *P* | **< 0.001** | **< 0.001** | **0.001** | **< 0.001** | 0.147 | **< 0.001** |
| **CV of GNDVI** | Estimate | 0.0004 | 0.0003 | 0.0000 | 0.0000 | 0.0024 | 0.0016 |
| Intercept | 0.0405 | 0.0373 | 0.0442 | 0.0389 | 0.0360 | 0.0346 |
| DF | 1032 | 1235 | 1032 | 1235 | 1016 | 1208 |
| Adjusted R2 | 0.018 | 0.015 | 0.000 | 0.002 | 0.059 | 0.034 |
| *P* | **< 0.001** | **< 0.001** | 0.439 | 0.083 | **< 0.001** | **< 0.001** |
| **Cig** | **Mean Cig** | Estimate | 0.0265 | 0.0168 | -0.0013 | -0.0020 | 0.0096 | 0.0221 |
| Intercept | 0.4597 | 0.3842 | 0.7012 | 0.5704 | 0.6319 | 0.4383 |
| DF | 1032 | 1235 | 1032 | 1235 | 1016 | 1208 |
| Adjusted R2 | 0.169 | 0.123 | 0.008 | 0.038 | 0.001 | 0.019 |
| *P* | **< 0.001** | **< 0.001** | **0.003** | **< 0.001** | 0.136 | **< 0.001** |
| **CV of Cig** | Estimate | 0.0019 | 0.0013 | -0.0001 | 0.0000 | 0.0063 | 0.0045 |
| Intercept | 0.0976 | 0.0873 | 0.1135 | 0.0973 | 0.0917 | 0.0828 |
| DF | 1032 | 1235 | 1032 | 1235 | 1016 | 1208 |
| Adjusted R2 | 0.051 | 0.035 | 0.000 | -0.001 | 0.057 | 0.038 |
| *P* | **< 0.001** | **< 0.001** | 0.345 | 0.89 | **< 0.001** | **< 0.001** |

**Table 5.** T-test summary for the effect of green roof type on mean NDVI, SAVI, GNDVI, and CIg. Statistically significant relationships (P < 0.05) are in boldface type.

| **Vegetation Index** | **Parameter** | **Season** | **Extensive green roof mean** | **Intensive green roof mean** | **t-value** | **DF** | ***P*** |
| --- | --- | --- | --- | --- | --- | --- | --- |
| NDVI | Mean NDVI | Growing season | 0.204 | 0.158 | 5.662 | 1032 | **< 0.001** |
| Pre-growing season | 0.138 | 0.121 | 3.171 | 1235 | **0.002** |
| CV of NDVI | Growing season | 0.034 | 0.039 | -4.488 | 1235 | **< 0.001** |
| Pre-growing season | 0.041 | 0.040 | 0.460 | 1032 | 0.646 |
| SAVI | Mean NDVI | Growing season | 0.163 | 0.132 | 4.289 | 1032 | **< 0.001** |
| Pre-growing season | 0.117 | 0.099 | 3.689 | 1235 | **< 0.001** |
| CV of NDVI | Growing season | 0.034 | 0.033 | 0.424 | 1032 | 0.672 |
| Pre-growing season | 0.028 | 0.032 | -3.237 | 1235 | **0.001** |
| GNDVI | Mean NDVI | Growing season | 0.235 | 0.193 | 4.756 | 1032 | **< 0.001** |
| Pre-growing season | 0.194 | 0.164 | 4.582 | 1235 | **< 0.001** |
| CV of NDVI | Growing season | 0.045 | 0.039 | 3.772 | 1032 | **< 0.001** |
| Pre-growing season | 0.040 | 0.040 | -0.360 | 1235 | 0.719 |
| CIg | Mean NDVI | Growing season | 0.688 | 0.538 | 4.670 | 1032 | **< 0.001** |
| Pre-growing season | 0.528 | 0.436 | 4.372 | 1235 | **< 0.001** |
| CV of NDVI | Growing season | 0.115 | 0.099 | 3.823 | 1032 | **< 0.001** |
| Pre-growing season | 0.097 | 0.098 | -0.373 | 1235 | 0.710 |

**Table 6.** Descriptive statistics for the temporal changes of individual green roofs with at least three years of data grouped by vegetation type (grass, sedum mat, woody plant, and a mix of grass and woody plant). Significance of trends are based on P < 0.05.

| **Vegetation type** | **Total number** | **Count of significant increase** | **Percentage of vegetation type showing significant increase (%)** | **Count of significant decrease** | **Percentage of vegetation type showing significant decrease (%)** |
| --- | --- | --- | --- | --- | --- |
| Grass | 175 | 1 | 3.7 | 11 | 28.2 |
| Sedum mat | 570 | 19 | 70.4 | 24 | 61.5 |
| Woody plant | 193 | 6 | 22.2 | 4 | 10.3 |
| Mix of grass and woody plant | 8 | 1 | 3.7 | 0 | 0 |
| Sum | 946 | 27 | 40.9 | 39 | 59.1 |

**Table 7.** Multiple linear regression models for the design factors resulting in the temporal increase and decrease of mean NDVI on individual green roofs, with vegetation type included as the predictor. Asterisks indicate significance of one-way ANOVA: (*), P < 0.1 *, P < 0.05; **, P < 0.01; ***, P < 0.001. Statistically significant relationships (P < 0.05) are in boldface type.

| **Predictors** | **NDVI** | | | |
| --- | --- | --- | --- | --- |
|  | **Growing season** | | **Pre-growing season** | |
|  | **Increase** | **Decrease** | **Increase** | **Decrease** |
| **Intercept** | 0.1972*** | 0.1308*** | 0.1168*** | 0.0770*** |
| **Roof module area** | 0.0001** | 0.0002*** | - | 0.0002*** |
| **Building height** | –0.0009** | –0.0002 | - | –0.0004** |
| **Vegetation type: mix of grass and tree (vs. grass)** | –0.0020 | 0.1121* | 0.0051 | - |
| **Vegetation type: sedum mat (vs. grass)** | 0.0622* | 0.0686*** | 0.0620** | 0.0466*** |
| **Vegetation type: woody plants (vs. grass)** | 0.0724* | 0.0223 | 0.0452 (*) | 0.0208 |
| **Roof module aspect ratio** | –0.0006 | –0.0004 | - | 0.0004 (*) |
| **AIC** | –998 | –1616 | –555 | –1239 |
| **Adjusted R2** | 0.0699 | 0.189 | 0.051 | 0.214 |
| ***P*-value** | **0.001** | **< 0.001** | **0.042** | **< 0.001** |

**Table 8.** Multiple linear regression models for the design factors resulting in the temporal increase and decrease of mean NDVI on individual green roofs, with green roof type included as the predictor. Asterisks indicate significance of one-way ANOVA: (*), P < 0.1 *, P < 0.05; **, P < 0.01; ***, P < 0.001. Statistically significant relationships (P < 0.05) are in boldface type.

| **Predictors** | **NDVI** | | | |
| --- | --- | --- | --- | --- |
|  | **Growing season** | | **Pre-growing season** | |
|  | **Increase** | **Decrease** | **Increase** | **Decrease** |
| **Intercept** | 0.2556*** | 0.1821*** | 0.1959*** | 0.1001*** |
| **Roof module area** | 0.0001* | 0.0002*** | - | 0.0002*** |
| **Building height** | –0.0008** | –0.0001 | –0.0006** | –0.0003* |
| **Green roof type (1 = int, 0 = ext)** | –0.0346 (*) | –0.0390** | 0.0242 (*) | - |
| **Roof module aspect ratio** | - | –0.0002 | - | 0.0005** |
| **AIC** | –999 | –1598 | –1136 | –1225 |
| **Adjusted R2** | 0.063 | 0.140 | 0.041 | 0.152 |
| ***P*-value** | **< 0.001** | **< 0.001** | **0.004** | **< 0.001** |

**Table 9.** Empirical linear regressions (reflectance = constant a × digital numbers) between digital numbers and reflectance for each band in each year.

| **Year** | **Band** | **Reflectance of the white/grey roof** | **DNs of the white/grey roof** | **Constant a** |
| --- | --- | --- | --- | --- |
| 2011 | Red | 0.67641 | 62492.67568 | 0.00001 |
| 2011 | Green | 0.68659 | 62117.59459 | 0.00001 |
| 2011 | Blue | 0.67595 | 61258.82310 | 0.00001 |
| 2011 | Near-infrared | 0.63495 | 58181.13759 | 0.00001 |
| 2012 | Red | 0.67641 | 252.81126 | 0.00268 |
| 2012 | Green | 0.68659 | 246.44689 | 0.00279 |
| 2012 | Blue | 0.67595 | 248.69996 | 0.00272 |
| 2012 | Near-infrared | 0.63495 | 228.68176 | 0.00278 |
| 2013 | Red | 0.67641 | 250.61820 | 0.00270 |
| 2013 | Green | 0.68659 | 251.71862 | 0.00273 |
| 2013 | Blue | 0.67595 | 251.94247 | 0.00268 |
| 2013 | Near-infrared | 0.63495 | 249.18410 | 0.00255 |
| 2014 | Red | 0.57751 | 222.31117 | 0.00260 |
| 2014 | Green | 0.57252 | 200.42077 | 0.00286 |
| 2014 | Blue | 0.55941 | 206.70090 | 0.00271 |
| 2014 | Near-infrared | 0.53573 | 187.69611 | 0.00285 |
| 2015 | Red | 0.67641 | 245.02529 | 0.00276 |
| 2015 | Green | 0.68659 | 246.61187 | 0.00278 |
| 2015 | Blue | 0.67595 | 246.90272 | 0.00274 |
| 2015 | Near-infrared | 0.63495 | 244.00000 | 0.00260 |
| 2016 | Red | 0.67641 | 252.33333 | 0.00268 |
| 2016 | Green | 0.68659 | 249.63462 | 0.00275 |
| 2016 | Blue | 0.67595 | 253.00000 | 0.00267 |
| 2016 | Near-infrared | 0.63495 | 244.17436 | 0.00260 |
| 2017 | Red | 0.40552 | 174.59606 | 0.00232 |
| 2017 | Green | 0.40491 | 165.41020 | 0.00245 |
| 2017 | Blue | 0.38614 | 160.38090 | 0.00241 |
| 2017 | Near-infrared | 0.40894 | 168.36055 | 0.00243 |
| 2018 | Red | 0.67641 | 251.08272 | 0.00269 |
| 2018 | Green | 0.68659 | 252.03580 | 0.00272 |
| 2018 | Blue | 0.67595 | 253.05309 | 0.00267 |
| 2018 | Near-infrared | 0.63495 | 248.18642 | 0.00256 |

**Table 10.** Equations for Normalized Difference Vegetation Index (NDVI), Soil Adjusted Vegetation Index (SAVI), Green Normalized Difference Vegetation Index (GNDVI), and Green Chlorophyll Index (CIg).

| **Vegetation indices** | **Expressions** | **References** |
| --- | --- | --- |
| NDVI (Normalized Difference Vegetation Index) |  | (Rouse & Haas, 1974) |
| SAVI (Soil Adjusted Vegetation Index) |  | (Huete, 1988) |
| GNDVI (Green Normalized Difference Vegetation Index) |  | (Gitelson & Merzlyak, 1998) |
| GCI (Green Chlorophyll Index) |  | (Gitelson et al., 2003) |
