# Supplementary material for: Variation in green roof vegetation health driven by age and design
Source: Research Square preprint supplement (doi:10.21203/rs.3.rs-6049604/v1), 2025-02-28
Supplement: Supplementary file 2 [file c10d211f76e2ab99b0693280.docx]

**Extended Data for:**

**Variation in green roof vegetation health driven by age and design**

Wenxi Liao1,2 *, Madison Appleby3, Howard Rosenblat3, Md. Abdul Halim1, Cheryl Rogers4, Jing M. Chen5, Liat Margolis3, Jennifer A. P. Drake6, Sean C. Thomas1

1Institute of Forestry and Conservation, John H Daniels Faculty of Architecture Landscape and Design, University of Toronto, 33 Willcocks St., Toronto, ON, M5S 3B3, Canada

2Department of Chemical Engineering, McGill University, 3610 Rue University, Montreal, QC, H3A 0C5, Canada

3John H. Daniels Faculty of Architecture, Landscape, and Design, University of Toronto, 1 Spadina Cres., Toronto, ON, M5S 2J5, Canada

4Department of Geography and Environmental Studies, Toronto Metropolitan University, 350 Victoria St., Toronto, ON, M5B 2K3, Canada

5Department of Geography and Planning, University of Toronto, 100 St George St., Toronto, ON, M5S 3G3, Canada

6Department of Civil and Environmental Engineering, Carleton University, 1125 Colonel By Drive, Ottawa, ON, K1S 5B6, Canada

* Corresponding author: Wenxi Liao

E-mail address: [wenxi.liao@mcgill.ca](mailto:wenxi.liao@mcgill.ca)

**Extended Data 1.** Framework for the data collection, processing, and analysis in this study. The grey panel shows the processes for the green roof identification and orthoimage collection and processing. The green panel indicates the processes for the vegetation health and patchiness determination. The blue panel shows the design feature data collection processes for each green roof. The orange panel indicates the investigation processes for the temporal changes of vegetation health and patchiness and the effects of design drivers on vegetation health and patchiness. The symbols were generated by OpenAI ChatGPT.

**Extended Data 2.** The selected green roofs within the boundaries of the City of Toronto and the downtown area in this study. A total of 242 green roofs, including 1,759 individual green roof modules were identified as shown in the map. Green roofs are shown in green dots and the downtown areas are shown as the orange polygon.
